# Supplementary material for: RANK is a poor prognosis marker and a therapeutic target in ER‐negative postmenopausal breast cancer
Source: EMBO Mol Med. 2023 Mar 7;15(4):e16715. doi: 10.15252/emmm.202216715 (PMC10086586; doi:10.15252/emmm.202216715)
Supplement: Supplementary file 1 — Expanded View Figures pdf [file EMMM-15-e16715-s003.pdf]

## Expanded View Figures

**Figure EV1. RANK is expressed in tumor and stromal cells of human BC and associates with ER/PR-negative tumors.**

- A Percentage of patients expressing RANK or tmRANKL in tumor and stromal cells in BC samples. The total number of patients is indicated.
- B H-Score values of tumor RANK and tmRANKL from *IDB*, *NPS* collections and the *METABRIC* dataset. Mean  $\pm$  SEM is shown.
- C Percentage of BC patients with RANK<sup>+</sup> tumors according to the indicated clinicopathologic parameters in the *METABRIC* cohort. Total number of analyzed patients per parameter and *p*-values (Pearson's Chi-Square test (Exact Sig. 2- Side)) are indicated.

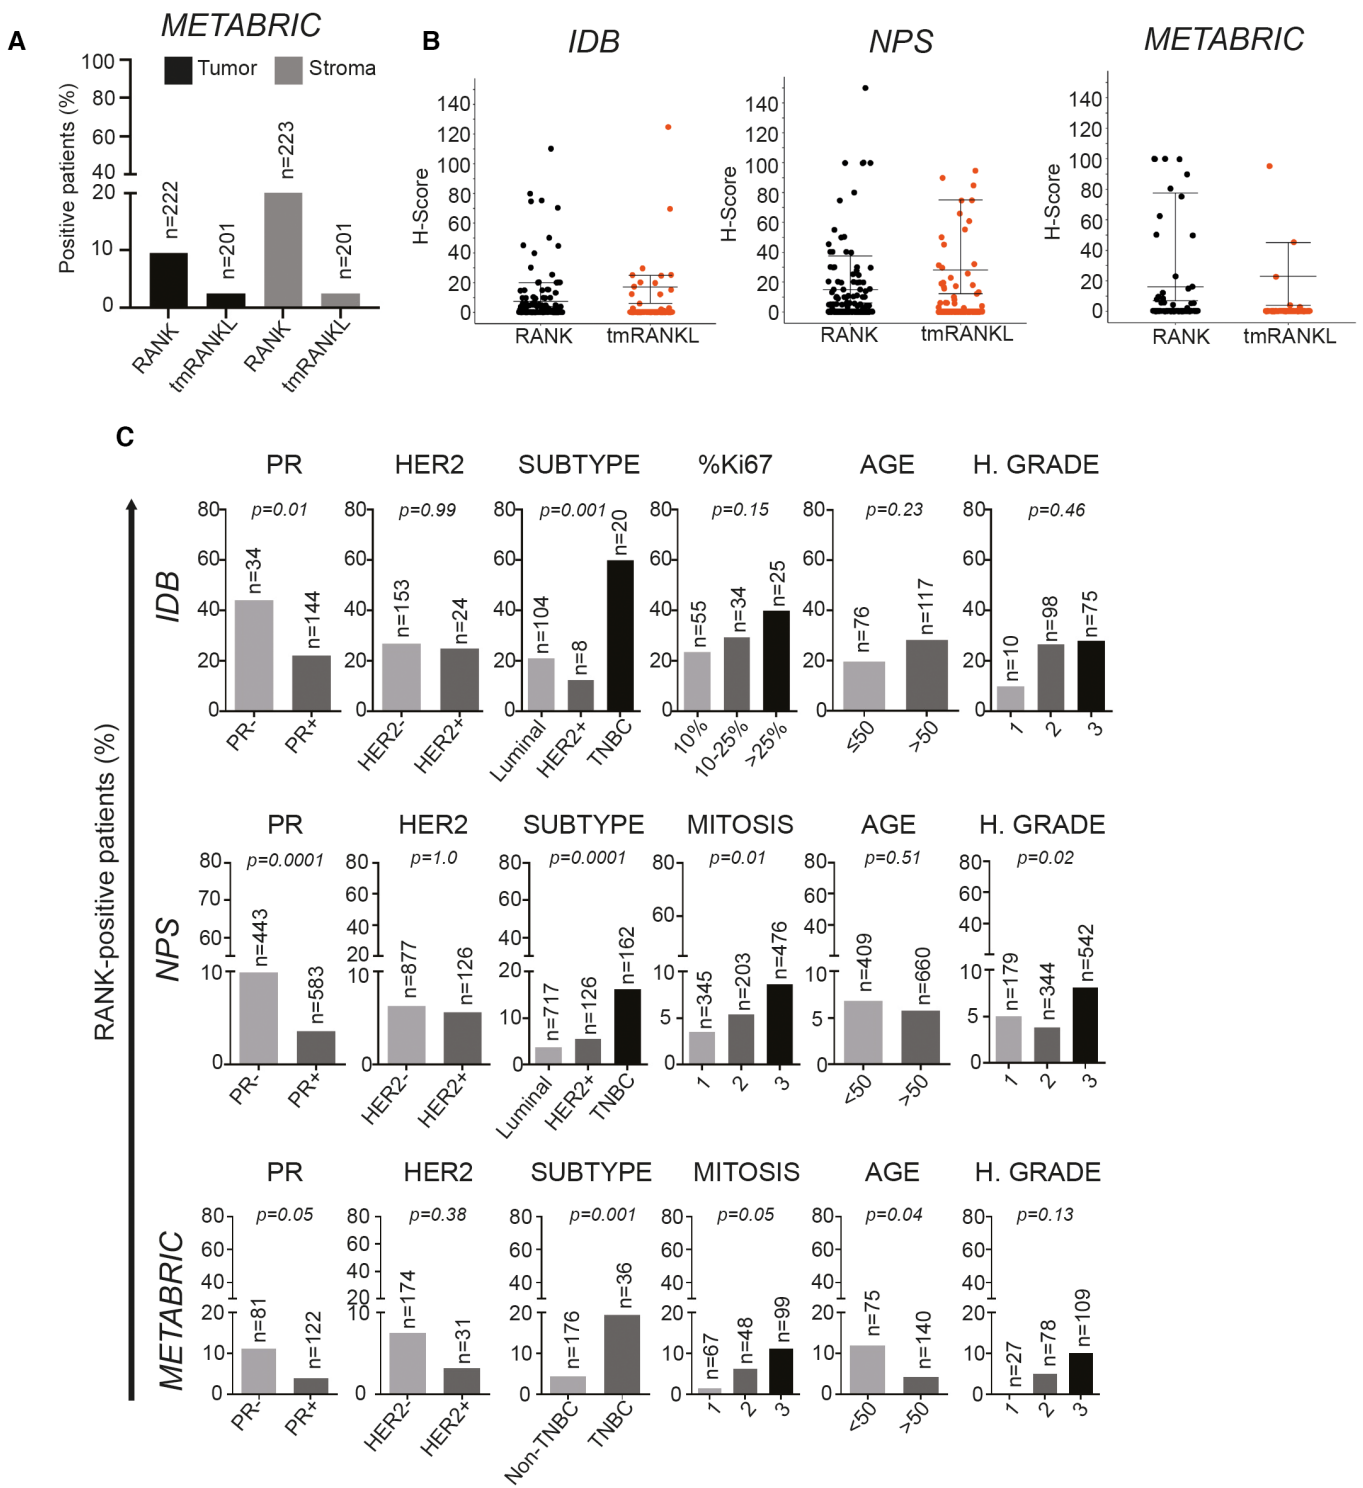

Figure EV1.

**Figure EV2. RANK is expressed and active in a subset of BC PDXs.**

- A RANK and RANKL mRNA expression levels relative to *PPIA* in the indicated BC PDXs, organized according to ER status in the human tumor of origin and *RANK* mRNA expression. Two-tailed t-student test was used to evaluate the RANK/RANKL differential expression between ER<sup>-</sup> and ER<sup>+</sup> BC PDXs. # Indicates models where RANK and RANKL expression were analyzed by IHC.
- B Representative images of RANK and RANKL protein expression in BC PDXs detected by IHC. H-Score (H) of the models (and not of the picture) are shown. A total of 3–5 independent tumors per PDX were scored for RANK.
- C Western blot analyses of P-p65, P-IKBo and corresponding total proteins after RANKL stimulation in the indicated PDXs. Tubulin was used as a loading control.
- D Gene expression analyses of the indicated NFkB target genes in PDX tumor organoids after 24 h of RANKL stimulation. Expression levels relative to the untreated controls are shown. Each dot represents organoids from an independent BC PDX tumor. Mean  $\pm$  SEM and *p*-value of two-tailed t-student test are shown.

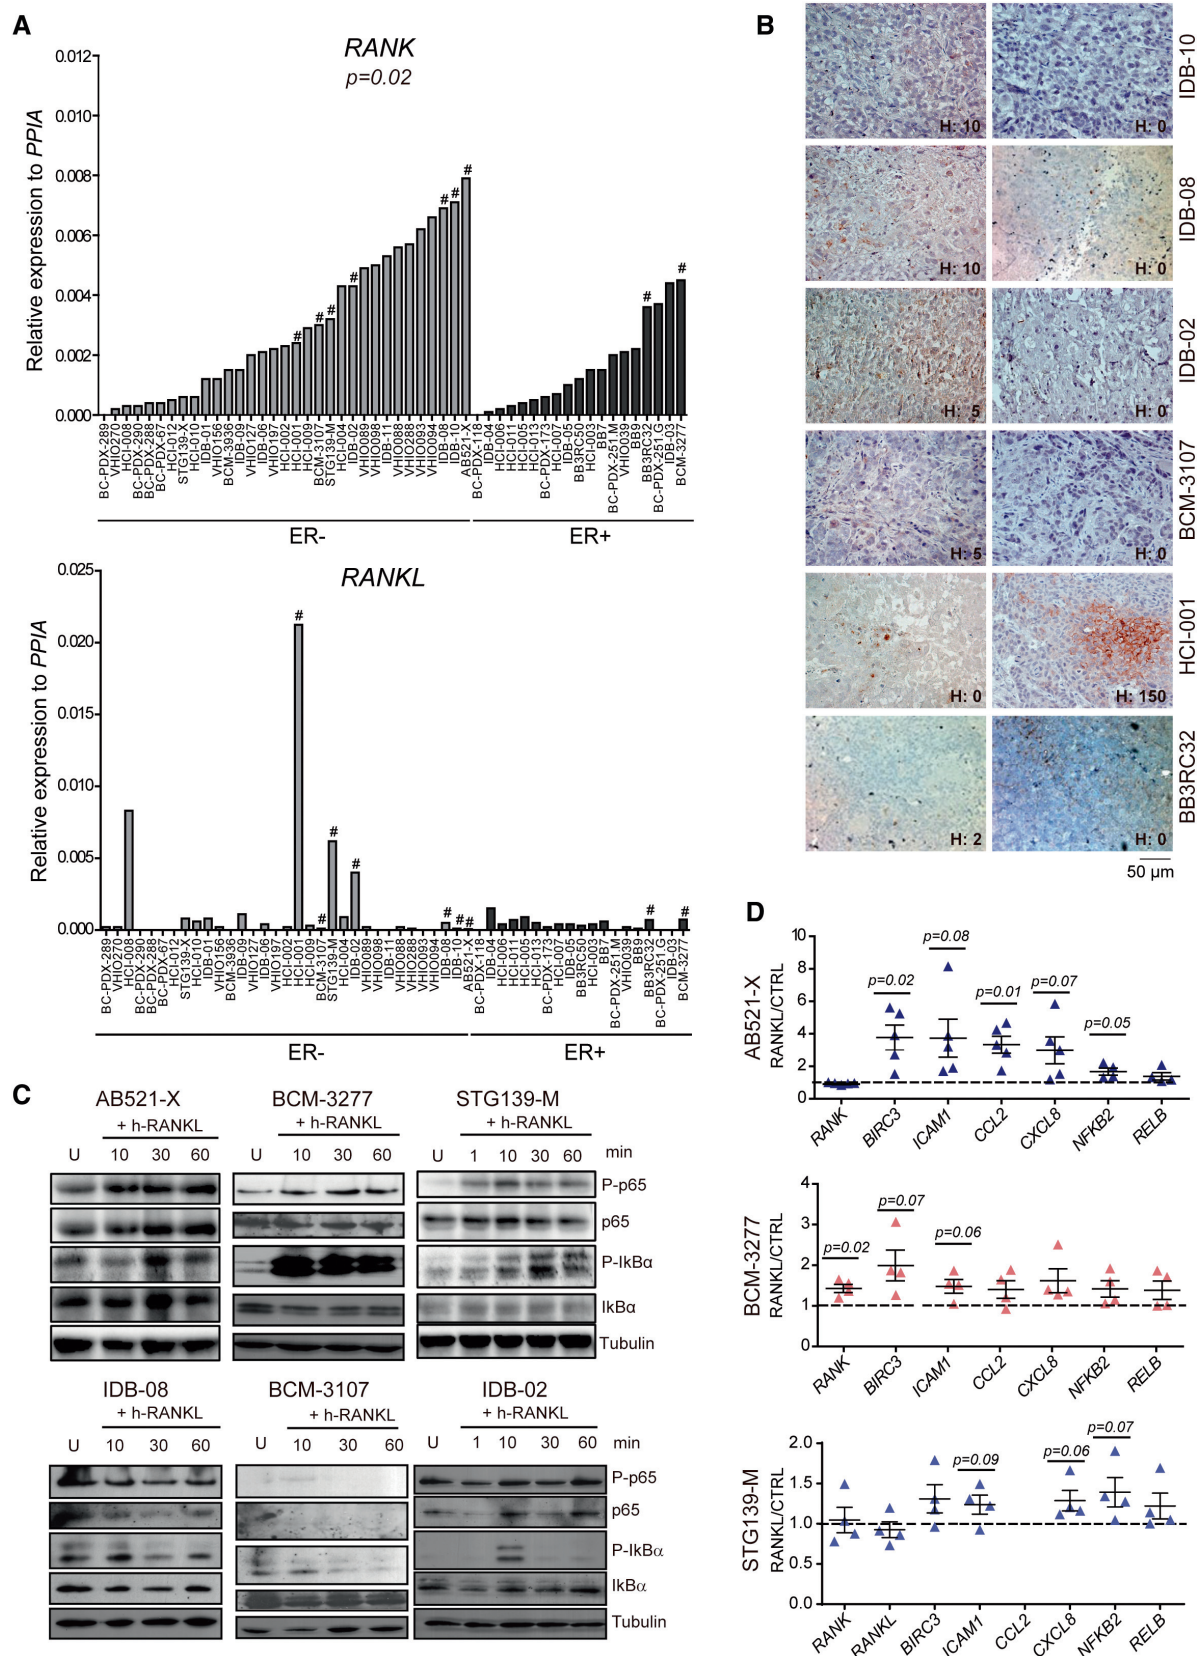

Figure EV2.

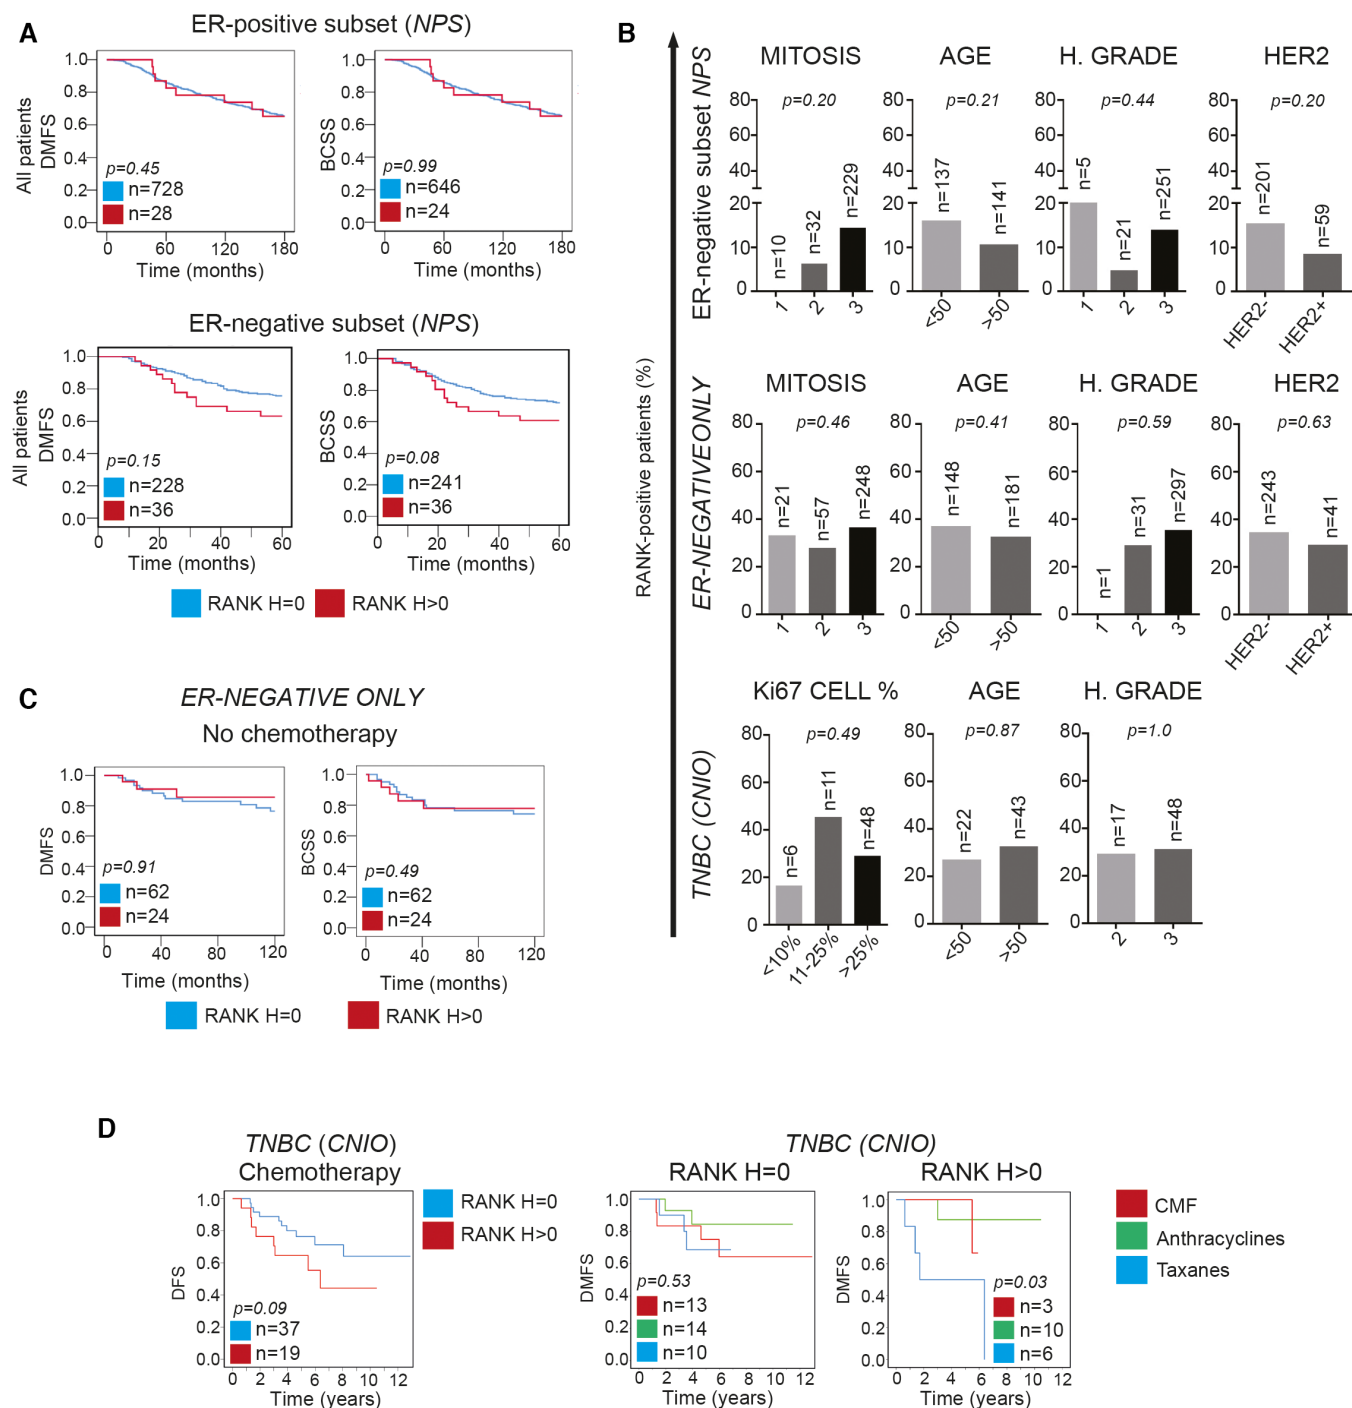

**Figure EV3. RANK tumor expression is not related to any clinicopathologic factor in ER<sup>-</sup> BC.**

A BCSS and DMFS in the ER<sup>+</sup> and ER<sup>-</sup> subsets from the NPS collection according to RANK expression in all patients.

B Percentage of RANK<sup>+</sup> BC patients according to the indicated clinicopathologic parameters in the three ER<sup>-</sup> collections analyzed: NPS ER<sup>-</sup> subset, ER-NEGATIVE ONLY and TNBC (CNIO). Total number of analyzed patients per parameter and p-values (Pearson's Chi-Square test (Exact Sig. 2-side)) are indicated.

C DMFS and BCSS according to RANK expression in patients with ER<sup>-</sup> tumors not treated with chemotherapy in the ER-NEGATIVE ONLY collection.

D RANK expression and DMFS in RANK<sup>-</sup> (H = 0) and RANK<sup>+</sup> (H > 0) tumor samples from the TNBC (CNIO) collection treated with chemotherapy and according to the chemotherapy regimen (group 1: CMF (cyclophosphamide, methotrexate, 5-fluorouracil); group 2: FAC (5-fluorouracil, doxorubicin, cyclophosphamide) or FEC (5-fluorouracil, epirubicin and cyclophosphamide); and group 3: CMF or FAC or FEC plus taxanes).

Data information: (A, C, D) Total number of analyzed patients per parameter and p-values (Log-rank test (Mantel-Cox)) are indicated.

**Figure EV4. RANKL inhibition in BC PDXs.**

- A Trap5b levels in mouse serum ( $n = 2$ ) in tumor-bearing PDXs treated *in vivo* with RANK-Fc or DNS. Mean  $\pm$  SD is shown.
- B, C Representative images (B) and quantification (C) of KI67 and cleaved caspase-3 staining measured by IHC in RANK<sup>+</sup> tumors of PDXs treated *in vivo* with RANK-Fc or DNS. Each dot represents one picture. Three representative pictures per tumor were quantified and at least 3–4 tumors per condition were analyzed. Mean  $\pm$  SEM and two-tailed *t*-test *p*-values are shown.
- D Percentage of cells with ALDH activity in tumors isolated from the indicated PDXs. Each dot represents one tumor. Mean  $\pm$  SEM and *p*-value of two-tailed *t*-student test are shown.
- E Gene set enrichment analysis (GSEA) of associated genes after *in vivo* treatment with RANK-Fc in NSG mice, which are common for the 3 PDX models studied. The matrix illustrates NES and FDR values. The color scale represents the NES. The size of the bubbles is proportional to the  $-\log_{10}$  of the FDR. For those signatures with an FDR = 0 after 1,000 permutations, we assigned an FDR =  $10^{-3}$  for visualization purposes. The signatures selected for this plot belong to Hallmark, Biocarta, Reactome and KEGG collections and have a reported FDR < 0.05 and a NES > 0 for all PDX models. The color legend indicates the main biological process associated with each signature.

Data information: (A–D) All the analysis were performed 24 h after last treatment.

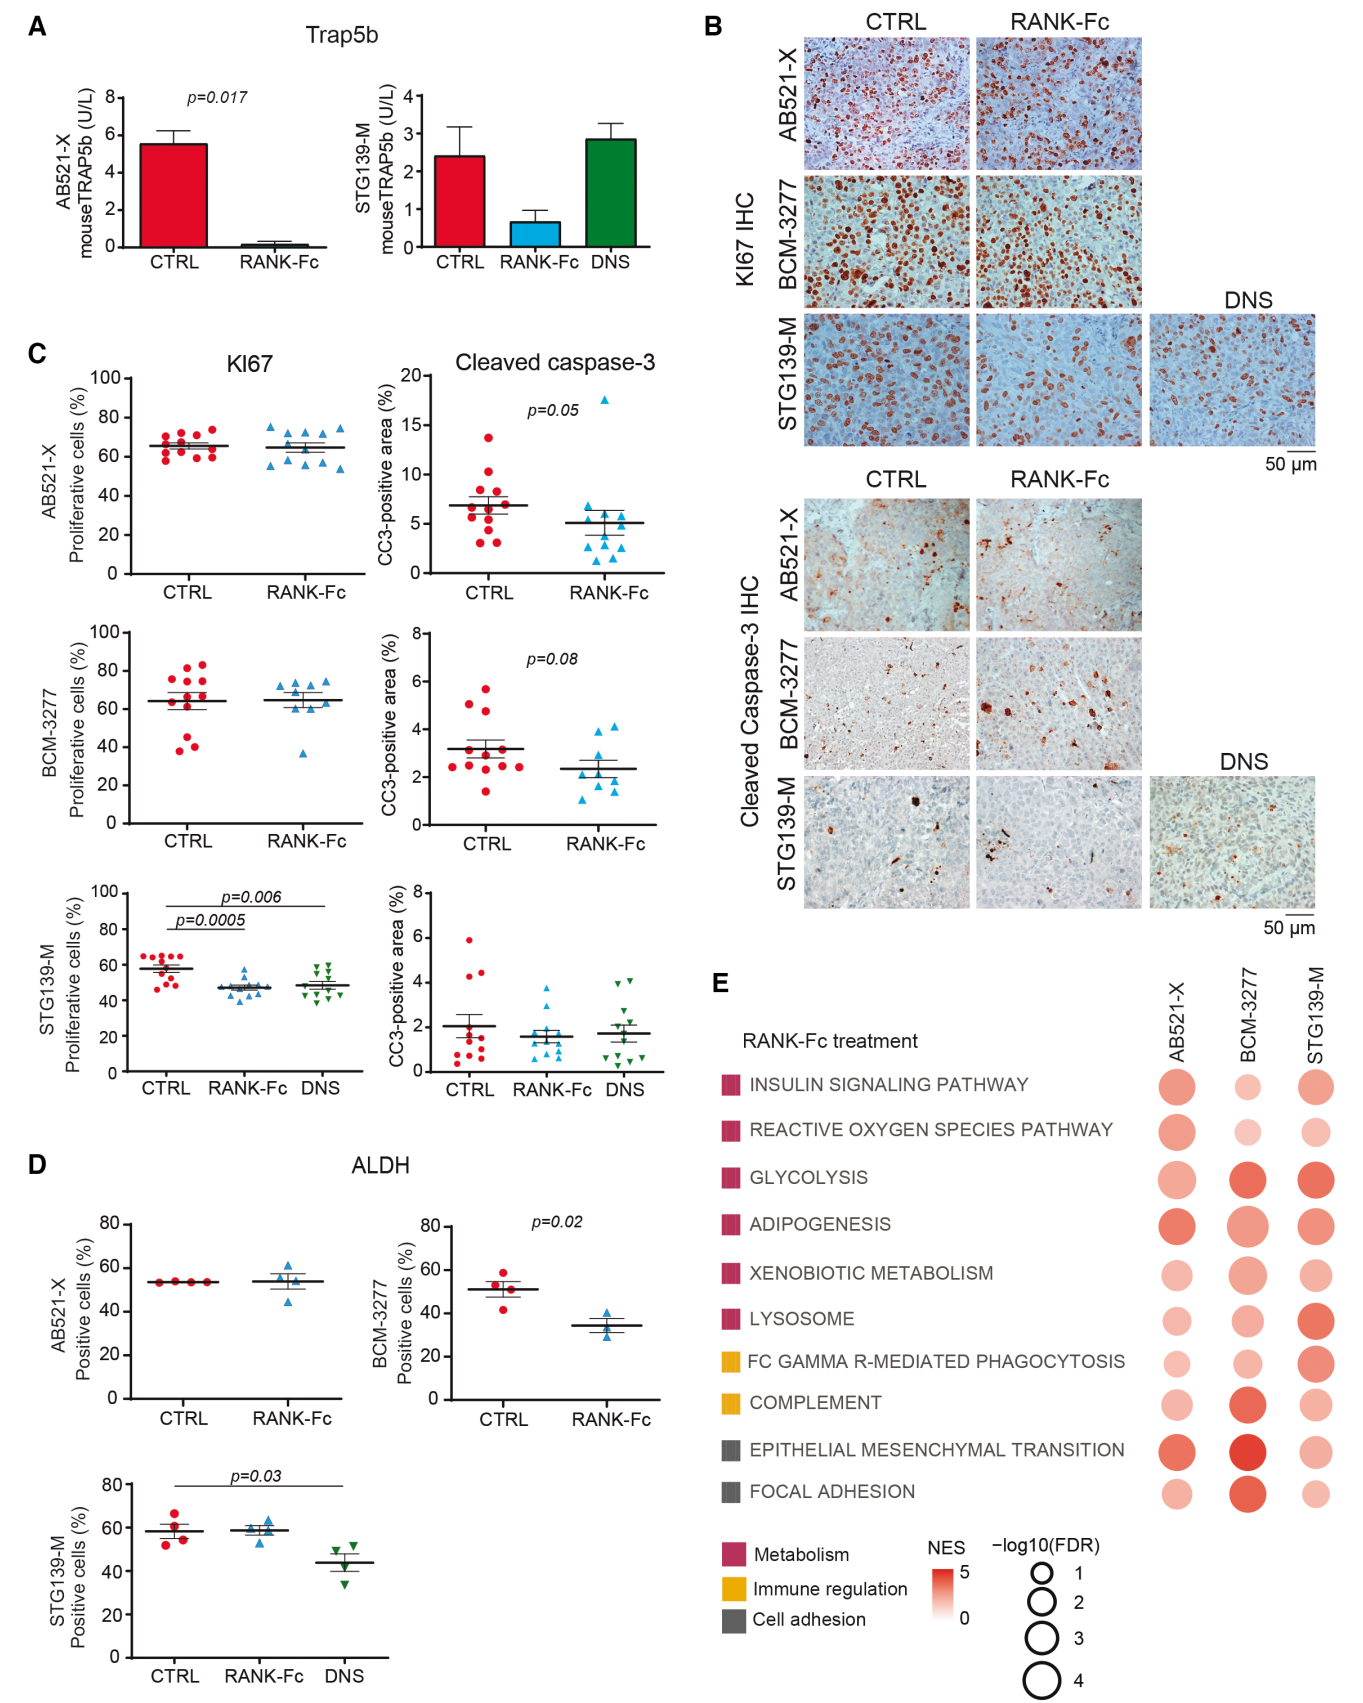

Figure EV4.

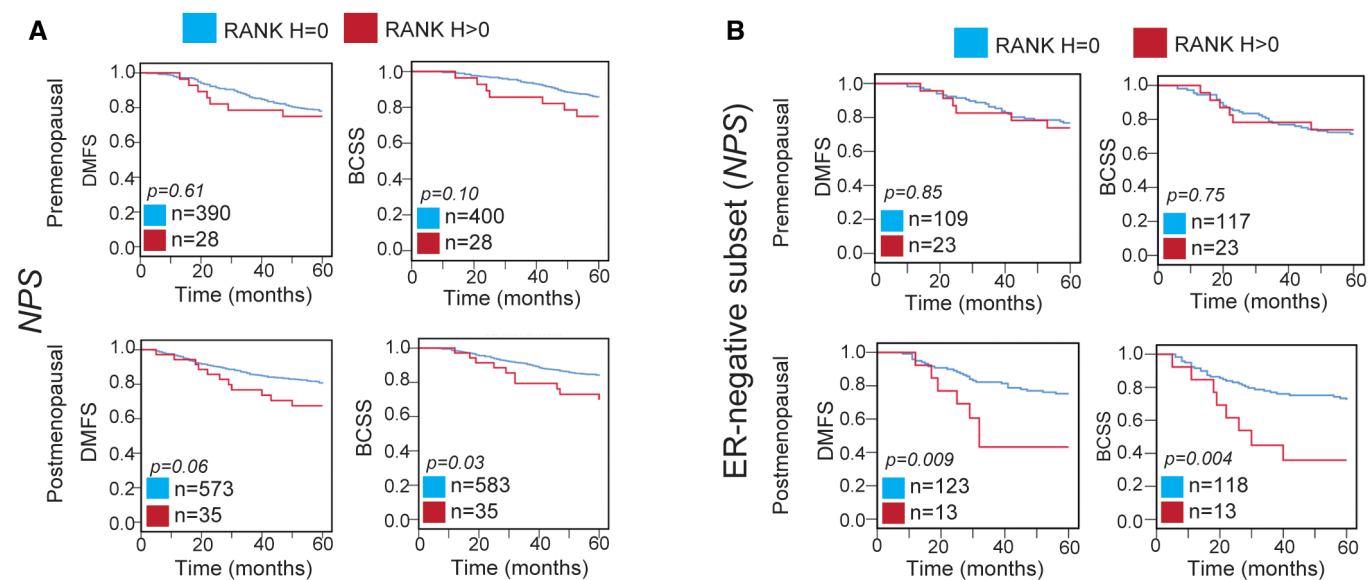

**Figure EV5. RANK is a marker of poor prognosis in BC after menopause.**

A, B DMFS and BCSS according to RANK expression (RANK<sup>-</sup> (H = 0) or RANK<sup>+</sup> (H > 0)) in premenopausal and postmenopausal patients of the NPS collection (A) and the NPS ER<sup>-</sup> subset (B).
